# Supplementary material for: Dual controlled delivery of squalenoyl-gemcitabine and paclitaxel using thermo-responsive polymeric micelles for pancreatic cancer
Source: Royal Society of Chemistry journal article supplement (doi:10.1039/c7tb02899g), 2018-01-01
Supplement: c7tb02899g1.pdf [file c7tb02899g1.pdf]

## Supporting information

### Dual Controlled Delivery of Squalenoyl-Gemcitabine and Paclitaxel using Thermo-Responsive Polymeric Micelles for Pancreatic Cancer

Mandana Emamzadeh,<sup>a</sup> Didier Desmaële<sup>b</sup>, Patrick Couvreur<sup>b</sup>, and George Pasparakis<sup>\*a</sup>

<sup>a</sup> University College London, School of Pharmacy, 29-39 Brunswick Square, WC1N 1AX London, United Kingdom.

<sup>b</sup> Université Paris-Sud, , Faculté de Pharmacie, 5 rue Jean-Baptiste Clément, F-92296 Châtenay-Malabry Cedex, France.

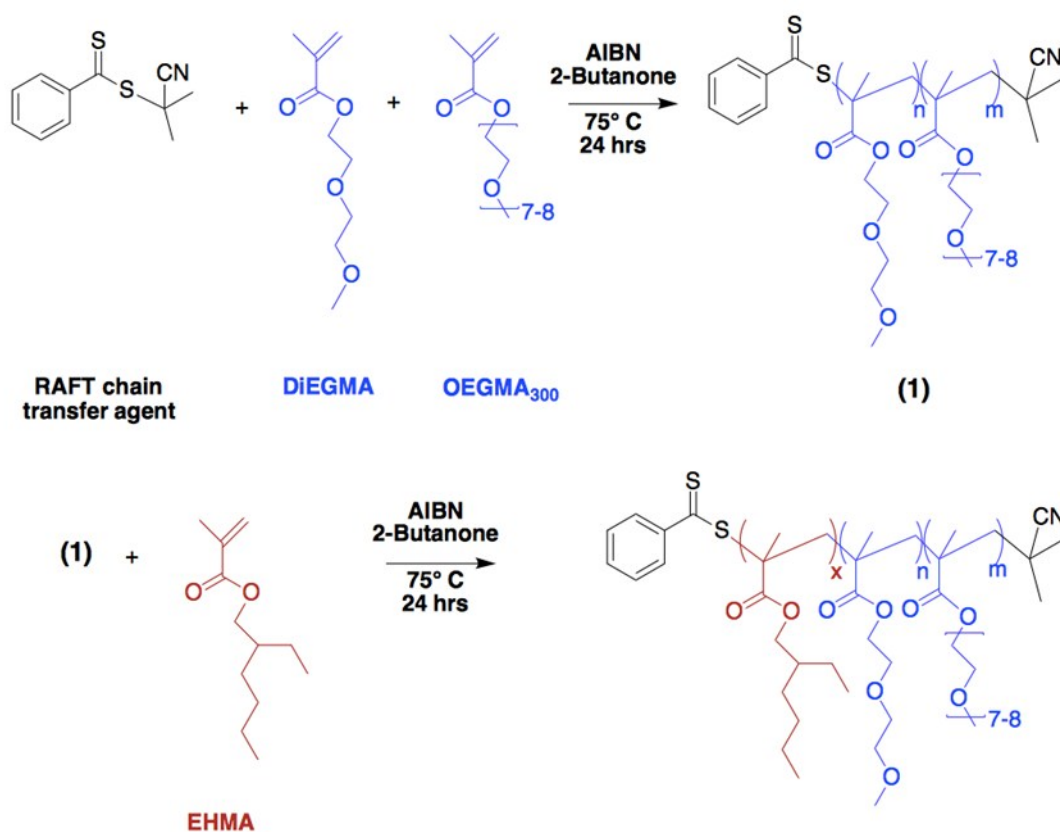

**Figure S1.** Synthesis of Poly (DiEGMA-co-OEGMA<sub>300</sub>)-b-EHMA by RAFT polymerization.

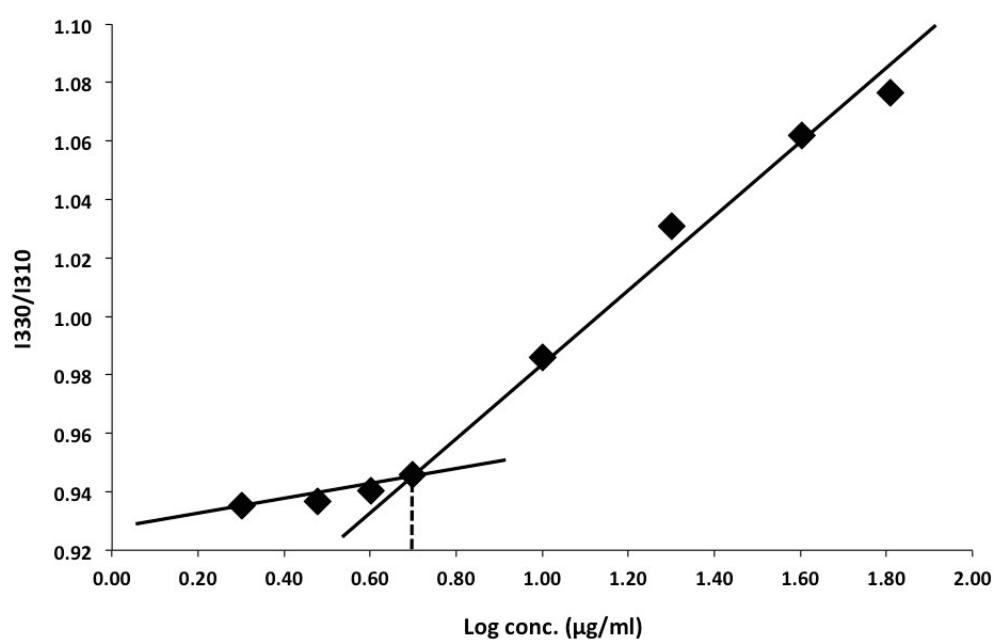

**Figure S2.** The CMC was measured by plotting pyrene intensity ratio (I330/I310) versus logarithm of polymer concentration.

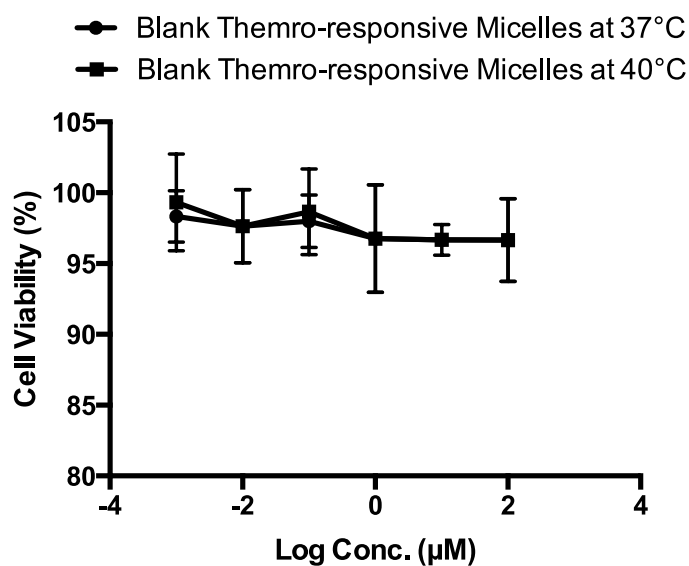

**Figure S3.** Cell viability of empty micelles below (37°C) and above (40°C) their LCST.
